# Supplementary material for: Third Epidemiological Analysis of Nasopharyngeal Carcinoma in the Central Region of Japan from 2006 to 2015
Source: MDPI journal article supplement (doi:10.3390/cancers11081180), 2019-08-15
Supplement: s1 [file s1]

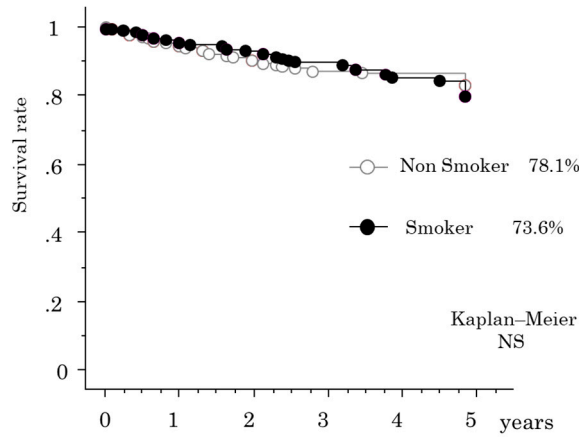

Supplementary Figure S1. Kaplan-Meier curve for overall survival according to smoking history in smokers and nonsmokers. The five-year survival rate was not significantly different from 78.1% for nonsmokers and 73.6% for smokers.

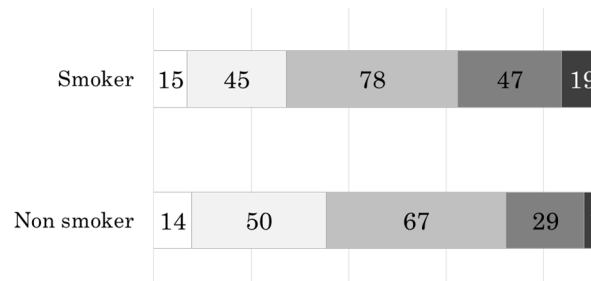

Supplementary Figure S2. Pretherapeutic clinical staging according to smoking history. There was no significant difference based on chi-square test.

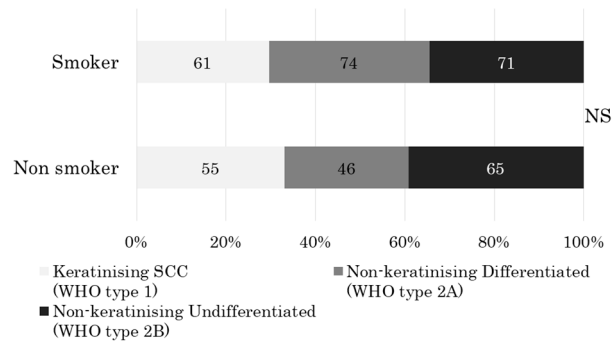

Supplementary Figure S3. Histologically classification according to the 2005 WHO criteria based on smoking history. There was no significant difference based on chi-square test.
